# Supplementary material
Source: Springer Nature journal article supplement (https://www.springermedizin.de/resource/supplementary/40345_2013_27_MOESM6_ESM.pdf/25658348)
Supplement: MOESM6 [file 25658348]

**Table 6 - Sub-set of participants who demonstrated positive change (quantitatively):**

| Qualitative Finding   | Participant Quotes                                                                                                                                                                                                                                                                                                                                                    |
|-----------------------|-----------------------------------------------------------------------------------------------------------------------------------------------------------------------------------------------------------------------------------------------------------------------------------------------------------------------------------------------------------------------|
| 1. Increased empathy  | Going from less information to after the play having more information has (...) opened up my compassion. 01-CM029                                                                                                                                                                                                                                                     |
| 2. Increased hope     | <p>Hope for recovery. (...) Anyone else that I meet that suffers from this and that is honest about what they've lived and how they've lived, and can share that – that gives me hope. 03-CM017</p> <p>It made me feel hopeful for the reduction in stigma. It made me feel hopeful for other people that were watching it that would be inspired by her. 01-HP43</p> |
| 3. Increased openness | <p>I'm probably more vocal about how it, about talking about mental illness than I was before I saw it. 01-HP024</p> <p>It made me, you know, more comfortable and maybe, made me maybe a little more able to tell people I have bipolar disorder. 02-CM006</p>                                                                                                       |

CM = person with lived experience of BD; HP = healthcare provider.
